# Supplementary material for: Comparison of Next-Generation Sequencing and Fluorescence In Situ Hybridization for Detection of Segmental Chromosomal Aberrations in Neuroblastoma
Source: MDPI journal article supplement (doi:10.3390/diagnostics11091702), 2021-09-17

**Figure S1.** An adjustment of gene location in the redesigned copy number plots, showing 11q deletion, 17q gain, and no 1p deletion (Case No. 21).

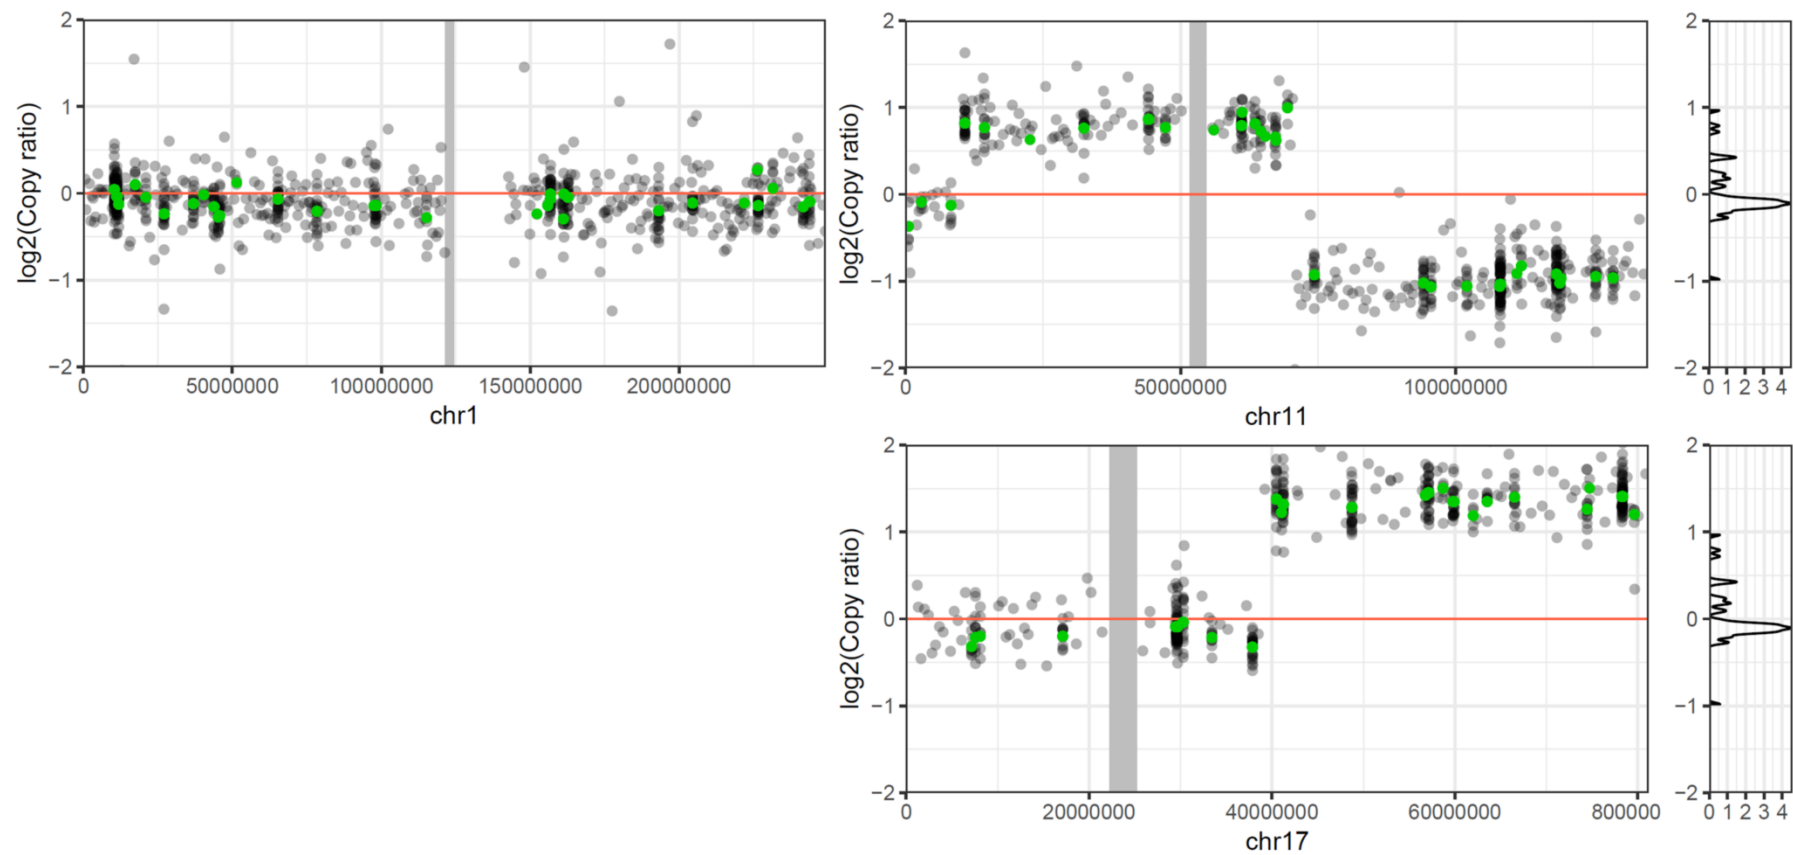

Figure S2. Clinicopathological information of 35 neuroblastoma cases.

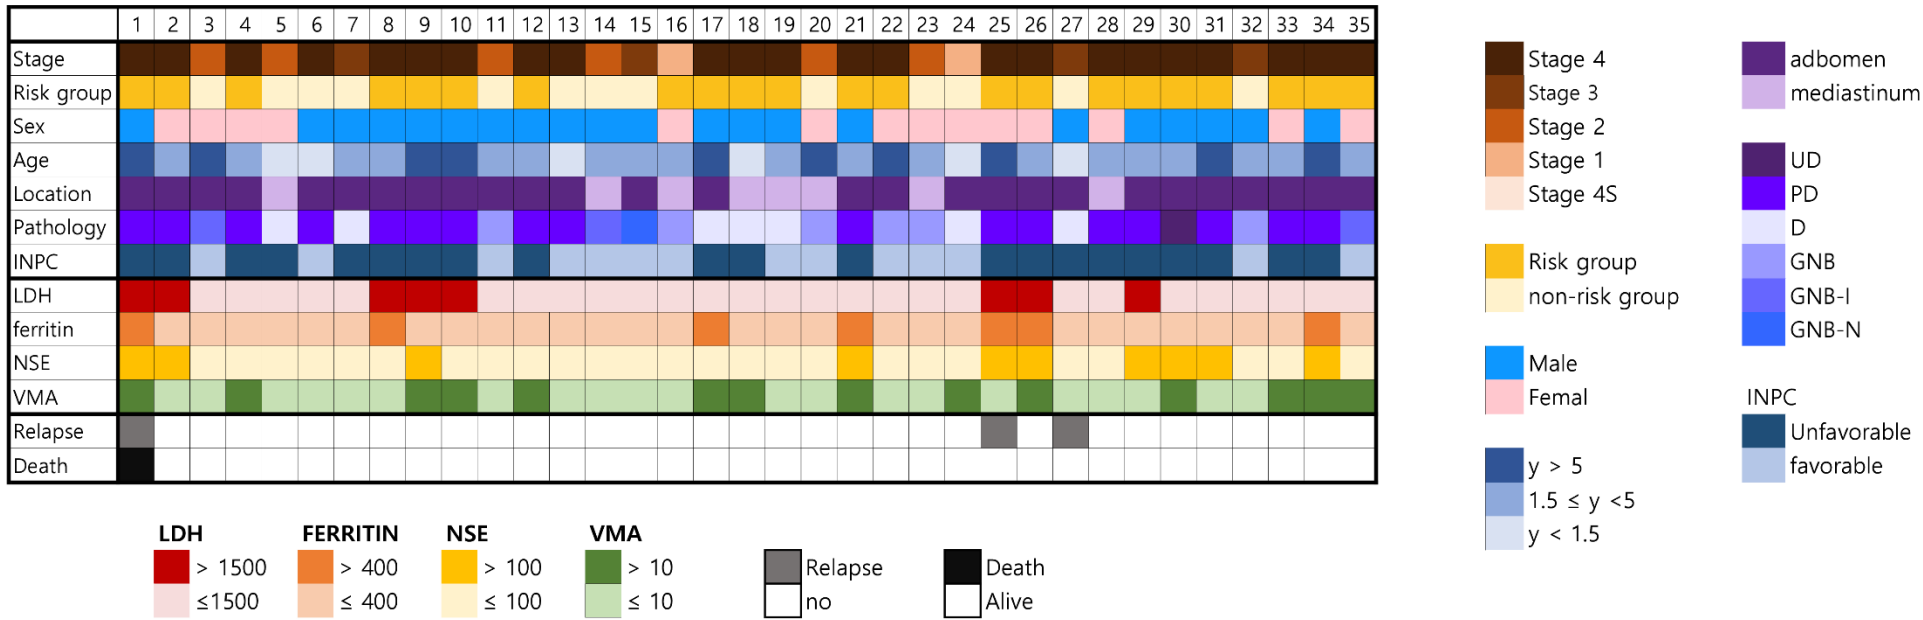

**Figure S3.** SCAs in the whole chromosomes of 35 neuroblastoma cases.

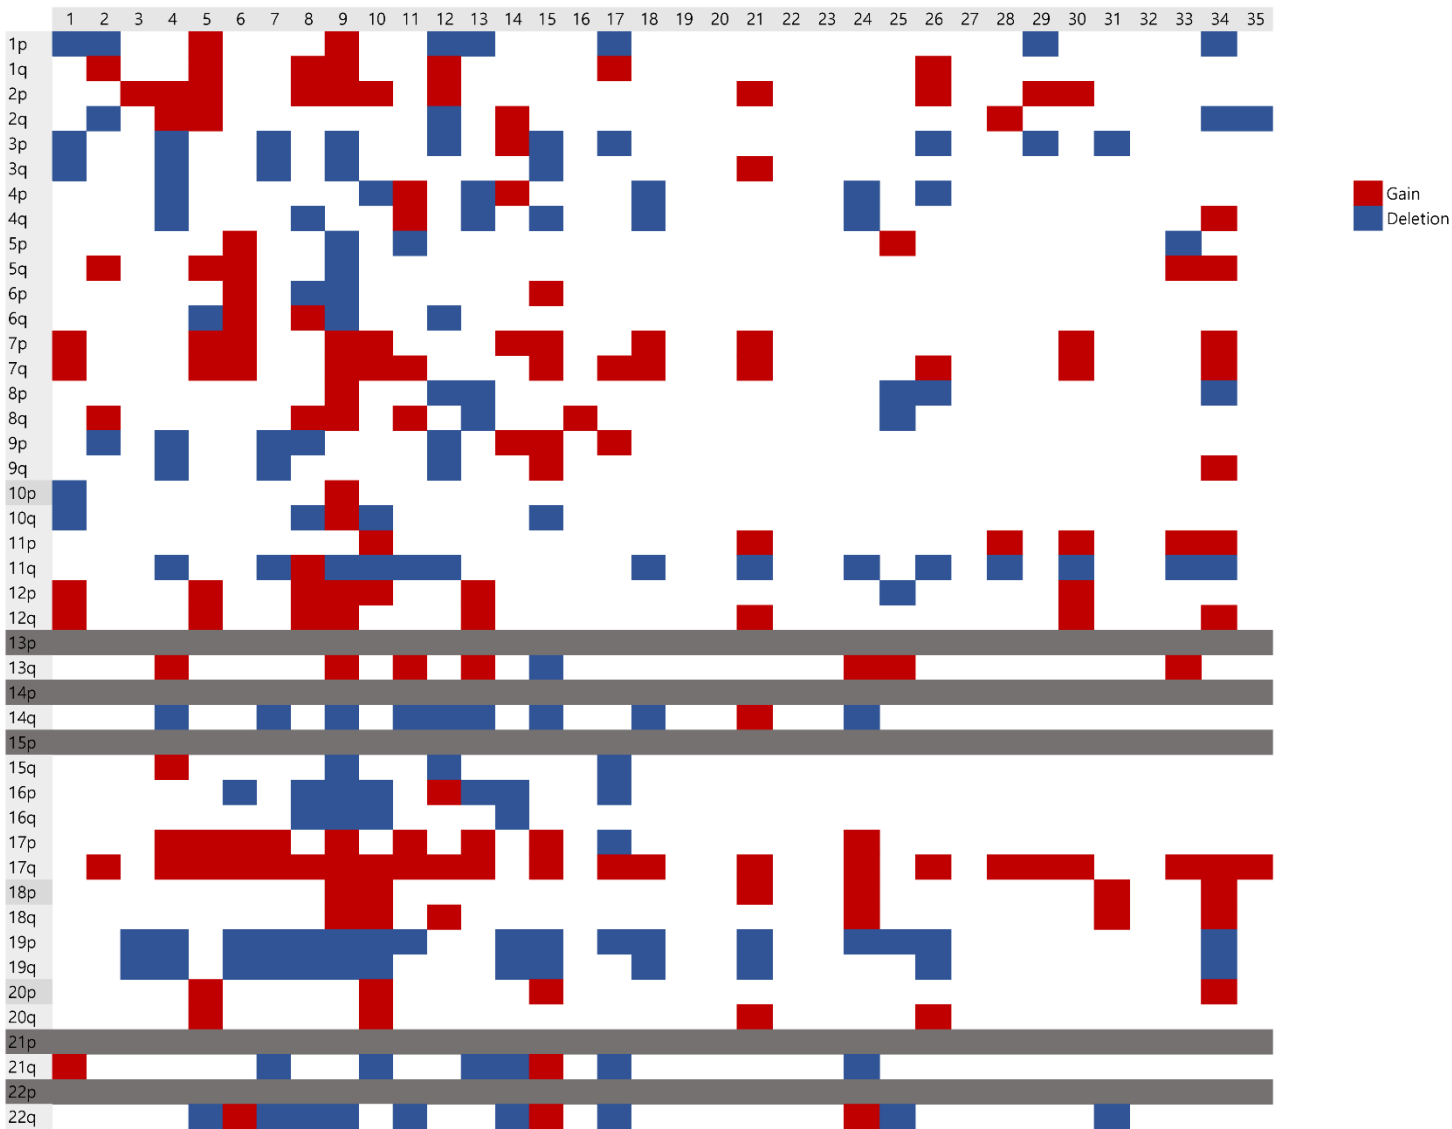

Supplement: s1 [file s1]
