# Supplementary material for: Comparison of Next-Generation Sequencing and Fluorescence In Situ Hybridization for Detection of Segmental Chromosomal Aberrations in Neuroblastoma
Source: MDPI journal article supplement (doi:10.3390/diagnostics11091702), 2021-09-17
Supplement: s1 [file s1]

**Table S1.** Target gene list of NGS assays

| CancerSCAN version 2 |         |        |          |         |         |         |          | PedSCAN  |         |         |          |        |         |          |       |
|----------------------|---------|--------|----------|---------|---------|---------|----------|----------|---------|---------|----------|--------|---------|----------|-------|
| ABL1                 | CARD11  | DOCK2  | FGFR4    | KIT     | NTRK3*  | REL     | TMPRSS2  | ABCB1    | CBL     | ERBB3   | GLI2     | MPL    | PIK3CB  | SEMA3C   | WRN   |
| ABL2                 | CASP8   | DOT1L  | FLT1     | KLF4    | NUP93   | RET*    | TNFAIP3  | ABCB11   | CBLB    | ERBB4   | GNA11    | MRE11A | PIK3R1  | SERPINB3 | WT1   |
| ACVR1B               | CBFB    | EGFR   | FLT3     | KLHL6   | PAK3    | RICTOR  | TNFRSF14 | ABCC1    | CCND1   | ERCC1   | GNAQ     | MSH2   | PIK3R2  | SETBP1   | XPB   |
| AKT1                 | CBL     | ELMO1  | FLT4     | KRAS    | PAK7    | RNF43   | TNKS     | ABCC3    | CCND2   | ERCC2   | GNA5     | MSH3   | PINK1   | SETD2    | XPC   |
| AKT2                 | CCND1   | EP300  | FOXA1    | LMO1    | PALB2   | ROBO1   | TNKS2    | ABCG2    | CCND3   | ERCC3   | GPC3     | MSH6   | PML     | SF3B1    | XRCC1 |
| AKT3                 | CCND2   | EPHA3  | FOXL2    | LRP1B   | PARP1   | ROBO2   | TOP1     | ABL1     | CD79A   | ERCC4   | GPC4     | MTHFR  | PMS1    | SH2B3    | XRCC3 |
| ALK*                 | CCND3   | EPHA5  | FUBP1    | LRP6    | PARP2   | ROS1*   | TP53     | ACVR1    | CD79B   | ERCC5   | GREM1    | MTOR   | PMS2    | SHH      | YAP1  |
| ALOX12B              | CCNE1   | EPHA6  | GATA1    | LTK     | PARP3   | RPA1    | TRAF7    | AHNAK2   | CDC73   | ERCC6   | GSTM1    | MTRR   | POLD1   | SHOC2    | ZNRF3 |
| APC                  | CD79A   | EPHA7  | GATA2    | MAML1   | PARP4   | RPTOR   | TRRAP    | AIP      | CDH1    | ERG     | GSTP1    | MUC16  | POLD3   | SHROOM2  |       |
| APCDD1               | CD79B   | EPHB1  | GATA3    | MAP2K1  | PAX5    | RUNX1   | TSC1     | AKT1     | CDK4    | ESR1    | H3F3A    | MUC4   | POLE    | SLCO1B1  |       |
| APOBEC3A             | CDC42   | EPHB4  | GID4     | MAP2K2  | PBRM1   | RUNX1T1 | TSC2     | AKT2     | CDK6    | ETV6    | HDAC2    | MUTYH  | POT1    | SMAD4    |       |
| APOBEC3B             | CDC73   | EPHB6  | GNA11    | MAP2K4  | PDGFRA  | SEMA3A  | TSHR     | AKT3     | CDK8    | EW5R1*  | HIF1A    | MYB    | POU6F2  | SMAD7    |       |
| AR                   | CDH1    | ERBB2  | GNA13    | MAP3K1  | PDGFRB  | SEMA3E  | U2AF1    | ALK*     | CDKN1C  | EXT1    | HIST1H3B | MYC    | PPM1D   | SMARCA1  |       |
| ARAF                 | CDH2    | ERBB3  | GNAQ     | MAP3K13 | PDK1    | SETBP1  | U2AF2    | AMER1    | CDKN2A  | EXT2    | HMBS     | MYCL   | PPOX    | SMARCA4  |       |
| ARFRP1               | CDH20   | ERBB4  | GNA5     | MCL1    | PGR     | SETD2   | USP9X    | ANKRD26  | CDKN2B  | EZH2    | HNFI1A   | MYCN   | PRCC    | SMARCB1  |       |
| ARID1A               | CDH5    | ERCC2  | ADGRA2   | MDM2    | PHF6    | SF3A1   | VHL      | APC      | CDKN2C  | FAH     | HRAS     | MYD88  | PRF1    | SMO      |       |
| ARID1B               | CDK12   | ERG    | GRIN2A   | MDM4    | PHLP2   | SF3B1   | WHSC1L1  | APOBEC3A | CEBPA   | FANCA   | IDH1     | NBN    | PRKAR1A | SNCAIP   |       |
| ARID2                | CDK4    | ESR1   | GSK3B    | MED12   | PIK3C3  | SRSF7   | WISP3    | APOBEC3B | CEP57   | FANCB   | IDH2     | NF1    | PTCH1   | SOD2     |       |
| ASXL1                | CDK6    | ETV1   | GUCY1A2  | MEF2B   | PIK3CA  | SH2B3   | WT1      | ARID1A   | CHEK1   | FANCC   | IDO1     | NF2    | PTCH2   | SOS1     |       |
| ATM                  | CDK8    | ETV4   | H3F3A    | MEN1    | PIK3CG  | SKP2    | WWP1     | ARID1B   | CHEK2   | FANCD2  | IGF1     | NFE2L2 | PTEN    | SPRED1   |       |
| ATR                  | CDKN2A  | ETV5   | HGF      | MET     | PIK3R1  | SLIT2   | XBP1     | ARID2    | CIC     | FANCE   | IGF1R    | NFKB1A | PTPN11  | SPRTN    |       |
| ATRX                 | CDKN2B  | ETV6   | HIST1H3B | MITF    | PIK3R2  | SMAD2   | XPO1     | ASXL1    | COLCA2  | FANCF   | IGF2R    | NHP2   | PTPRD   | SRC      |       |
| AURKA                | CDKN2C  | EW5R1* | HNFI1A   | MLH1    | PKHD1   | SMAD3   | XRCC3    | AT1C     | CREBBP  | FANCG   | IKZF1    | NKX2-1 | RAB27A  | SRSF2    |       |
| AURKB                | CDX2    | EYA2   | HOXA3    | MPL     | PLCG1   | SMAD4   | ZNF217   | ATM      | CSF1R   | FANCI   | IL7R     | NOP10  | RAC1    | SS18**   |       |
| AXIN1                | CEBPA   | EZH2   | HRAS     | MRE11A  | PMS2    | SMARCA1 | ZNF703   | ATR      | CSF3R   | FANCL   | ITK      | NOTCH1 | RAD21   | STAG2    |       |
| AXL                  | CHD1    | AMER1  | HSP90AA1 | MSH2    | PNRC1   | SMARCA4 | ZRSR2    | ATRX     | CSMD1   | FANCM   | JAK1     | NOTCH3 | RAD50   | STAT3    |       |
| B2M                  | CHD2    | FAM46C | IDH1     | MSH6    | PPP2R1A | SMARCB1 |          | AURKA    | CTDNBP1 | FAT1    | JAK2     | NPAT   | RAD51C  | STK11    |       |
| BACH1                | CHD4    | FANCA  | IDH2     | MTOR    | PRDM1   | SMARCD1 |          | AURKB    | CTNNB1  | FBXW7   | JAK3     | NPM1   | RAD51D  | SUFU     |       |
| BAP1                 | CHEK1   | FANCC  | IGF1     | MUTYH   | PRKAR1A | SMO     |          | AXIN1    | CTR9    | FGFR1   | KDM6A    | NRAS   | RAF1    | SUZ12    |       |
| BARD1                | CHEK2   | FANCD2 | IGF1R    | MYC     | PRKDC   | SOC1    |          | AXIN2    | CYL9    | FGFR2   | KDR      | NSD1   | RB1     | TCF12    |       |
| BCL2                 | CHUK    | FANCE  | IGF2R    | MYCL    | PRPF40B | SOX10   |          | B2M      | DDB1    | FGFR3   | KIF1B    | NT5C2  | RECQL4  | TERT     |       |
| BCL2A1               | CIC     | FANCF  | IKBKE    | MYCN    | PRSS8   | SOX2    |          | BAP1     | DDB2    | FGFR4   | KIT      | NTHL1  | RELA**  | TET2     |       |
| BCL2L1               | CRBN    | FANCG  | IKZF1    | MYD88   | PTCH1   | SOX9    |          | BARD1    | DDR2    | FH      | KMT2A    | NTRK1  | REST    | TFE3     |       |
| BCL2L2               | CREBBP  | FANCI  | IL7R     | NCOA3   | PTCH2   | SPEN    |          | BCL2     | DDX3X   | FLCN    | KMT2C    | NTRK2  | RET*    | TGFBF1   |       |
| BCL6                 | CRKL    | FANCL  | INHBA    | NCOR1   | PTEN    | SPOP    |          | BCL6     | DICER1  | FLG     | KMT2D    | NTRK3  | RHBDF2  | TGFBF2   |       |
| BCOR                 | CRLF2   | FANCM  | INPP4B   | NF1     | PTPN11  | SRC     |          | BCOR     | DIS3L2  | FLI1    | KRAS     | NUDT15 | RHPN2   | TINF2    |       |
| BCORL1               | CRLF2   | FAT3   | INSR     | NF2     | PTPRD   | SRSF1   |          | BCORL1   | DNMT3A  | FLT3    | LAMA5    | ODZ3   | RICTOR  | TMEM127  |       |
| BCR                  | CSF1R   | FBXW7  | IRF4     | NFE2L2  | RAB35   | SRSF2   |          | BLM      | DPYD    | FOXL2   | LMO1     | OR5T1  | RIT1    | TP53     |       |
| BLM                  | CTCF    | FGF10  | IRS2     | NFKB1A  | RAC1    | STAG2   |          | BMP4     | DROSHA  | FOXO1** | LRP1B    | OTX2   | RNF213  | TPMT     |       |
| BRAF                 | CTNNA1  | FGF12  | ITK      | NKX2-1  | RAC2    | STAT3   |          | BMPR1A   | DUSP10  | FOXR2   | MAP2K1   | PALB2  | ROS1*   | TRIM37   |       |
| BRCA1                | CTNNB1  | FGF14  | JAK1     | NKX3-1  | RAD50   | STAT4   |          | BRAF     | EBF1    | FRS2    | MAP2K2   | PARP1  | RRAS2   | TSC1     |       |
| BRCA2                | CUL4A   | FGF19  | JAK2     | NOTCH1  | RAD51   | STK11   |          | BRCA1    | EGFR    | FUBP1   | MAX      | PAX5   | RTEL1   | TSC2     |       |
| BRD2                 | CUL4B   | FGF23  | JAK3     | NOTCH2  | RAD51B  | SUFU    |          | BRCA2    | E1F3H   | G6PC    | MDM2     | PBRM1  | RUNX1   | TTN      |       |
| BRD3                 | CYLD    | FGF3   | JUN      | NOTCH3  | RAD51C  | SYK     |          | BRIP1    | EML4    | G6PD    | MDM4     | PDE6G  | RYR1    | TXNDC15  |       |
| BRD4                 | CYP17A1 | FGF4   | KAT6A    | NOTCH4  | RAD51D  | TBX22   |          | BTK      | EP300   | GAB1    | MED12    | PDGFRA | SBD5    | TXNDC16  |       |
| BRIP1                | DAXX    | FGF6   | KDM5A    | NPM1    | RAD52   | TBX3    |          | BUB1B    | EPCAM   | GATA1   | MEN1     | PDGFRB | SDHA    | TYK2     |       |
| BTG1                 | DDR2    | FGF7   | KDM5C    | NRAS    | RAD54L  | TERT    |          | C11ORF95 | EPHA3   | GATA2   | MET*     | PDPK1  | SDHAF2  | U2AF1    |       |
| BTK                  | DIS3    | FGFR1* | KDM6A    | NSD1    | RAF1    | TET2    |          | C8ORF34  | EPHB1   | GATA3   | MITF     | PHF6   | SDHB    | UGT1A1   |       |
| EMSY                 | DNMT1   | FGFR2* | KDR      | NTRK1*  | RARA    | TGFBF2  |          | CALR     | EPHB4   | GFI1B   | MLH1     | PHOX2B | SDHC    | VHL      |       |
| NUTM1                | DNMT3A  | FGFR3* | KEAP1    | NTRK2*  | RB1     | TIPARP  |          | CARD11   | ERBB2   | GLI1    | MN1      | PIK3CA | SDHD    | WAS      |       |

\* target region includes intronic fusion breakpoints

\*\* target region covers fusion breakpoints only
